# Supplementary material for: High-humidity tandem differential mobility analyzer for accurate determination of aerosol hygroscopic growth, microstructure, and activity coefficients over a wide range of relative humidity
Source: Copernicus journal article supplement (doi:10.5194/amt-13-2035-2020), 2020-04-22
Supplement: Supplementary file 1 [file amt-13-2035-2020-supplement.pdf]

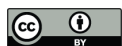

*Supplement of*

## **High-humidity tandem differential mobility analyzer for accurate determination of aerosol hygroscopic growth, microstructure, and activity coefficients over a wide range of relative humidity**

**Eugene F. Mikhailov and Sergey S. Vlasenko**

*Correspondence to:* Eugene F. Mikhailov (eugene.mikhailov@spbu.ru)

The copyright of individual parts of the supplement might differ from the CC BY 4.0 License.

## Supplementary material

### S.1 HHTDMA setup.

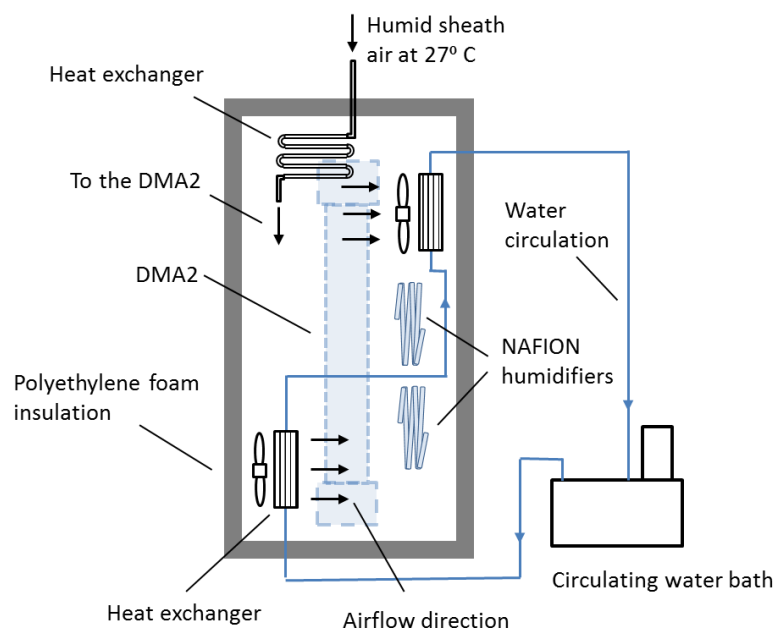

**Fig. S1.1** Schematic diagram of the temperature-controlled DMA2 box.

The test measurements showed that the temperature difference between the sheath and excess flows can be changed by  $\pm 0.3$  °C by adjusting the rotation speed of the fans. The speed of each fan is affected by applied AC voltage.

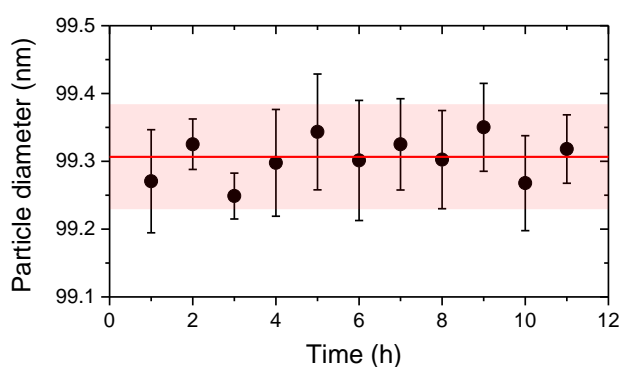

**Fig. S1.2** Dry particle stability characterized by test measurement of initial mobility diameter ( $D_{b,i}$ ) as selected with DMA1 and measured with DMA2 for ammonium sulfate particles over the full duration of an H-TDMA experiment (~10 h). Symbols and error bars represent the mean  $\pm 2$  standard deviation ( $\sigma$ ) of five-seven repeated measurements. Red line and fill area are the average of the all - 76 data points  $\pm 2\sigma$ , respectively.

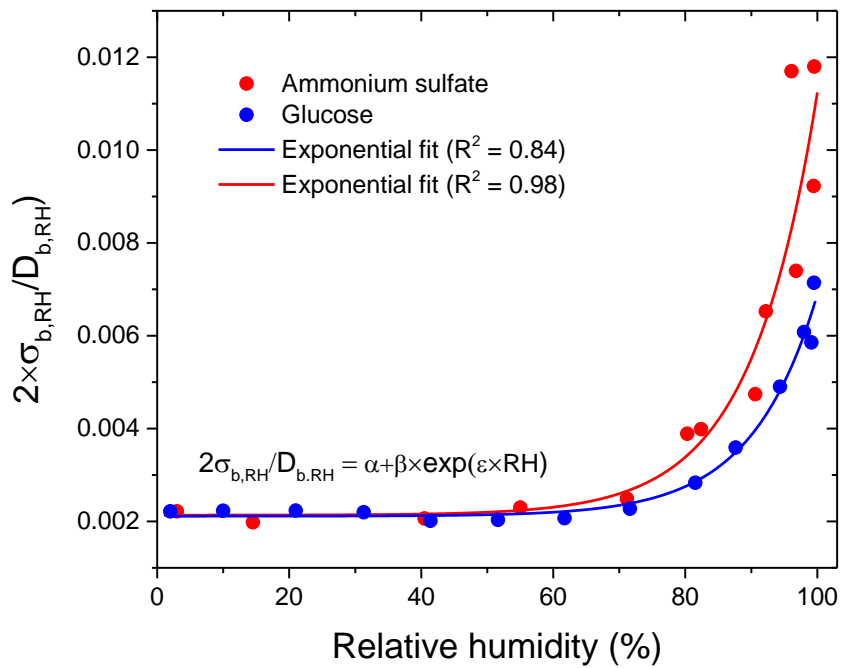

**Fig. S1.3** Relative uncertainty ( $2\sigma_{b,RH}/D_{b,RH}$ ) of DMA-2 measured mobility diameters as function of relative humidity and corresponding exponential fitting curves.

The best fitting parameters of exponential function for ammonium sulfate (AS) and glucose (GI) aerosol particles are  $\alpha_{AS} = 0.0021$ ;  $\beta_{AS} = 4.4391 \cdot 10^{-7}$ ;  $\epsilon_{AS} = 0.0993$  and  $\alpha_{GI} = 0.0021$ ;  $\beta_{GI} = 2.0508 \cdot 10^{-7}$ ;  $\epsilon_{GI} = 0.1006$ , respectively.
